# Supplementary material for: Evolutionary Patterns of Thylakoid Architecture in Cyanobacteria
Source: Front Microbiol. 2019 Feb 22;10:277. doi: 10.3389/fmicb.2019.00277 (PMC6395441; doi:10.3389/fmicb.2019.00277)
Supplement: Supplementary file 3 [file Table_3.XLSX]

## Sheet: List2
Table S3. Housekeeping genes identified in manuscript and used for the multilocus phylogenetic tree. Anotations were obtained in Kegg via www.kegg.jp/blastkoala/. Genes witout "Definition" were not validated in Kegg and their GenBank accesion numbers and descriptions are provided.
KO	Definition
K02313	dnaA; chromosomal replication initiator protein
K11717	sufS; cysteine desulfurase / selenocysteine lyase [EC:2.8.1.7 4.4.1.16]
K02337	dnaE; DNA polymerase III subunit alpha [EC:2.7.7.7]
K01962	accA; acetyl-CoA carboxylase carboxyl transferase subunit alpha [EC:6.4.1.2 2.1.3.15]
K00052	leuB; 3-isopropylmalate dehydrogenase [EC:1.1.1.85]
K01524	ppx-gppA; exopolyphosphatase / guanosine-5'-triphosphate,3'-diphosphate pyrophosphatase [EC:3.6.1.11 3.6.1.40]
K03076	secY; preprotein translocase subunit SecY
K02886	RP-L2; large subunit ribosomal protein L2
K00773	tgt; queuine tRNA-ribosyltransferase [EC:2.4.2.29]
K07391	comM; magnesium chelatase family protein
K08300	rne; ribonuclease E [EC:3.1.26.12]
K21147	moeZR; sulfur-carrier protein adenylyltransferase/sulfurtransferase [EC:2.7.7.80 2.7.7.- 2.8.1.11 2.8.1.-]
K01738	cysK; cysteine synthase [EC:2.5.1.47]
K01881	PARS; prolyl-tRNA synthetase [EC:6.1.1.15]
K01679	E4.2.1.2B; fumarate hydratase, class II [EC:4.2.1.2]
K22305	psp; phosphoserine phosphatase [EC:3.1.3.3]
K00162	PDHB; pyruvate dehydrogenase E1 component beta subunit [EC:1.2.4.1]
K03072	secD; preprotein translocase subunit SecD
K01736	aroC; chorismate synthase [EC:4.2.3.5]
K01710	E4.2.1.46; dTDP-glucose 4,6-dehydratase [EC:4.2.1.46]
K01866	YARS; tyrosyl-tRNA synthetase [EC:6.1.1.1]
K08482	kaiC; circadian clock protein KaiC
K01845	hemL; glutamate-1-semialdehyde 2,1-aminomutase [EC:5.4.3.8]
K02274	coxA; cytochrome c oxidase subunit I [EC:1.9.3.1]
K04043	dnaK; molecular chaperone DnaK
K00821	argD; acetylornithine/N-succinyldiaminopimelate aminotransferase [EC:2.6.1.11 2.6.1.17]
K03797	E3.4.21.102; carboxyl-terminal processing protease [EC:3.4.21.102]
K01883	CARS; cysteinyl-tRNA synthetase [EC:6.1.1.16]
K00858	ppnK; NAD+ kinase [EC:2.7.1.23]
K01972	E6.5.1.2; DNA ligase (NAD+) [EC:6.5.1.2]
K03555	mutS; DNA mismatch repair protein MutS
K02669	pilT; twitching motility protein PilT
K02111	ATPF1A; F-type H+-transporting ATPase subunit alpha [EC:3.6.3.14]
K01265	map; methionyl aminopeptidase [EC:3.4.11.18]
K01586	lysA; diaminopimelate decarboxylase [EC:4.1.1.20]
K01682	acnB; aconitate hydratase 2 / 2-methylisocitrate dehydratase [EC:4.2.1.3 4.2.1.99]
K01956	carA; carbamoyl-phosphate synthase small subunit [EC:6.3.5.5]
K05579	ndhH; NAD(P)H-quinone oxidoreductase subunit H [EC:1.6.5.3]
K00975	glgC; glucose-1-phosphate adenylyltransferase [EC:2.7.7.27]
K00284	E1.4.7.1; glutamate synthase (ferredoxin) [EC:1.4.7.1]
K00966	GMPP; mannose-1-phosphate guanylyltransferase [EC:2.7.7.13]
K00700	GBE1; 1,4-alpha-glucan branching enzyme [EC:2.4.1.18]
K01657	trpE; anthranilate synthase component I [EC:4.1.3.27]
K05356	SPS; all-trans-nonaprenyl-diphosphate synthase [EC:2.5.1.84 2.5.1.85]
K00820	glmS; glucosamine---fructose-6-phosphate aminotransferase (isomerizing) [EC:2.6.1.16]
K01689	ENO; enolase [EC:4.2.1.11]
K02232	cobQ; adenosylcobyric acid synthase [EC:6.3.5.10]
K02635	petB; cytochrome b6
K03686	dnaJ; molecular chaperone DnaJ
K09919	uncharacterized protein
K01952	purL; phosphoribosylformylglycinamidine synthase [EC:6.3.5.3]
K00764	purF; amidophosphoribosyltransferase [EC:2.4.2.14]
K03979	obgE; GTPase [EC:3.6.5.-]
K01951	guaA; GMP synthase (glutamine-hydrolysing) [EC:6.3.5.2]
K00514	ZDS; zeta-carotene desaturase [EC:1.3.5.6]
K00392	sir; sulfite reductase (ferredoxin) [EC:1.8.7.1]
K04077	groEL; chaperonin GroEL
K02294	crtR; beta-carotene hydroxylase [EC:1.14.13.-]
K00228	CPOX; coproporphyrinogen III oxidase [EC:1.3.3.3]
K03405	chlI; magnesium chelatase subunit I [EC:6.6.1.1]
K04043	dnaK; molecular chaperone DnaK
K03526	gcpE; (E)-4-hydroxy-3-methylbut-2-enyl-diphosphate synthase [EC:1.17.7.1 1.17.7.3]
K03531	ftsZ; cell division protein FtsZ
K01963	accD; acetyl-CoA carboxylase carboxyl transferase subunit beta [EC:6.4.1.2 2.1.3.15]
K01915	glnA; glutamine synthetase [EC:6.3.1.2]
K00609	pyrB; aspartate carbamoyltransferase catalytic subunit [EC:2.1.3.2]
K02293	PDS; 15-cis-phytoene desaturase [EC:1.3.5.5]
K01662	dxs; 1-deoxy-D-xylulose-5-phosphate synthase [EC:2.2.1.7]
K01595	ppc; phosphoenolpyruvate carboxylase [EC:4.1.1.31]
K02703	psbA; photosystem II P680 reaction center D1 protein [EC:1.10.3.9]
K00937	ppk; polyphosphate kinase [EC:2.7.4.1]
K01940	argG; argininosuccinate synthase [EC:6.3.4.5]
K03701	uvrA; excinuclease ABC subunit A
K02335	polA; DNA polymerase I [EC:2.7.7.7]
K11206	NIT1; deaminated glutathione amidase [EC:3.5.1.128]
K00611	OTC; ornithine carbamoyltransferase [EC:2.1.3.3]
K06207	typA; GTP-binding protein
K01887	RARS; arginyl-tRNA synthetase [EC:6.1.1.19]
K01738	cysK; cysteine synthase [EC:2.5.1.47]
K01924	murC; UDP-N-acetylmuramate--alanine ligase [EC:6.3.2.8]
K00873	PK; pyruvate kinase [EC:2.7.1.40]
K02641	petH; ferredoxin--NADP+ reductase [EC:1.18.1.2]
K12574	rnj; ribonuclease J [EC:3.1.-.-]
K02358	tuf; elongation factor Tu
K02355	fusA; elongation factor G
K01255	CARP; leucyl aminopeptidase [EC:3.4.11.1]
K01928	murE; UDP-N-acetylmuramoyl-L-alanyl-D-glutamate--2,6-diaminopimelate ligase [EC:6.3.2.13]
K09118	uncharacterized protein
K00208	fabI; enoyl-[acyl-carrier protein] reductase I [EC:1.3.1.9 1.3.1.10]
K03106	SRP54; signal recognition particle subunit SRP54 [EC:3.6.5.4]
K05515	mrdA; penicillin-binding protein 2 [EC:3.4.16.4]
K01749	hemC; hydroxymethylbilane synthase [EC:2.5.1.61]
K16149	1
K00464	diox1; all-trans-8'-apo-beta-carotenal 15,15'-oxygenase [EC:1.13.11.75]
K03544	clpX; ATP-dependent Clp protease ATP-binding subunit ClpX
K00812	aspB; aspartate aminotransferase [EC:2.6.1.1]
K02470	gyrB; DNA gyrase subunit B [EC:5.99.1.3]
K05573	ndhB; NAD(P)H-quinone oxidoreductase subunit 2 [EC:1.6.5.3]
K05575	ndhD; NAD(P)H-quinone oxidoreductase subunit 4 [EC:1.6.5.3]
K03110	ftsY; fused signal recognition particle receptor
K03596	lepA; GTP-binding protein LepA
K09013	sufC; Fe-S cluster assembly ATP-binding protein
K01791	wecB; UDP-N-acetylglucosamine 2-epimerase (non-hydrolysing) [EC:5.1.3.14]
K03742	pncC; nicotinamide-nucleotide amidase [EC:3.5.1.42]
K00600	glyA; glycine hydroxymethyltransferase [EC:2.1.2.1]
K03644	lipA; lipoyl synthase [EC:2.8.1.8]
K10206	E2.6.1.83; LL-diaminopimelate aminotransferase [EC:2.6.1.83]
K01872	AARS; alanyl-tRNA synthetase [EC:6.1.1.7]
K03086	rpoD; RNA polymerase primary sigma factor
K00615	E2.2.1.1; transketolase [EC:2.2.1.1]
K09458	fabF; 3-oxoacyl-[acyl-carrier-protein] synthase II [EC:2.3.1.179]
K01652	E2.2.1.6L; acetolactate synthase I/II/III large subunit [EC:2.2.1.6]
K01870	IARS; isoleucyl-tRNA synthetase [EC:6.1.1.5]
K01733	thrC; threonine synthase [EC:4.2.3.1]
K00928	lysC; aspartate kinase [EC:2.7.2.4]
K00145	argC; N-acetyl-gamma-glutamyl-phosphate reductase [EC:1.2.1.38]
K01696	trpB; tryptophan synthase beta chain [EC:4.2.1.20]
K03182	ubiD; 4-hydroxy-3-polyprenylbenzoate decarboxylase [EC:4.1.1.98]
K00705	malQ; 4-alpha-glucanotransferase [EC:2.4.1.25]
K00620	argJ; glutamate N-acetyltransferase / amino-acid N-acetyltransferase [EC:2.3.1.35 2.3.1.1]
K00033	PGD; 6-phosphogluconate dehydrogenase [EC:1.1.1.44 1.1.1.343]
K09014	sufB; Fe-S cluster assembly protein SufB
K02469	gyrA; DNA gyrase subunit A [EC:5.99.1.3]
K06942	ychF; ribosome-binding ATPase
K00927	PGK; phosphoglycerate kinase [EC:2.7.2.3]
K00088	IMPDH; IMP dehydrogenase [EC:1.1.1.205]
K01879	glyS; glycyl-tRNA synthetase beta chain [EC:6.1.1.14]
K00962	pnp; polyribonucleotide nucleotidyltransferase [EC:2.7.7.8]
K04035	E1.14.13.81; magnesium-protoporphyrin IX monomethyl ester (oxidative) cyclase [EC:1.14.13.81]
K09903	pyrH; uridylate kinase [EC:2.7.4.22]
K03087	rpoS; RNA polymerase nonessential primary-like sigma factor
K14441	rimO; ribosomal protein S12 methylthiotransferase [EC:2.8.4.4]
K03147	thiC; phosphomethylpyrimidine synthase [EC:4.1.99.17]
K06941	rlmN; 23S rRNA (adenine2503-C2)-methyltransferase [EC:2.1.1.192]
K01868	TARS; threonyl-tRNA synthetase [EC:6.1.1.3]
K02835	prfA; peptide chain release factor 1
K04043	dnaK; molecular chaperone DnaK
K03702	uvrB; excinuclease ABC subunit B
K01262	pepP; Xaa-Pro aminopeptidase [EC:3.4.11.9]
K00602	purH; phosphoribosylaminoimidazolecarboxamide formyltransferase / IMP cyclohydrolase [EC:2.1.2.3 3.5.4.10]
K00948	PRPS; ribose-phosphate pyrophosphokinase [EC:2.7.6.1]
K01878	glyQ; glycyl-tRNA synthetase alpha chain [EC:6.1.1.14]
K01897	ACSL; long-chain acyl-CoA synthetase [EC:6.2.1.3]
K00104	glcD; glycolate oxidase [EC:1.1.3.15]
K03043	rpoB; DNA-directed RNA polymerase subunit beta [EC:2.7.7.6]
K03046	rpoC; DNA-directed RNA polymerase subunit beta' [EC:2.7.7.6]
K03046	rpoC; DNA-directed RNA polymerase subunit beta' [EC:2.7.7.6]
K11473	glcF; glycolate oxidase iron-sulfur subunit
K03517	nadA; quinolinate synthase [EC:2.5.1.72]
K02703	psbA; photosystem II P680 reaction center D1 protein [EC:1.10.3.9]
K03168	topA; DNA topoisomerase I [EC:5.99.1.2]
K02689	psaA; photosystem I P700 chlorophyll a apoprotein A1
K02690	psaB; photosystem I P700 chlorophyll a apoprotein A2
K01784	galE; UDP-glucose 4-epimerase [EC:5.1.3.2]
K02837	prfC; peptide chain release factor 3
K03070	secA; preprotein translocase subunit SecA
K14652	ribBA; 3,4-dihydroxy 2-butanone 4-phosphate synthase / GTP cyclohydrolase II [EC:4.1.99.12 3.5.4.25]
K00161	PDHA; pyruvate dehydrogenase E1 component alpha subunit [EC:1.2.4.1]
K00790	murA; UDP-N-acetylglucosamine 1-carboxyvinyltransferase [EC:2.5.1.7]
K01469	OPLAH; 5-oxoprolinase (ATP-hydrolysing) [EC:3.5.2.9]
K00930	argB; acetylglutamate kinase [EC:2.7.2.8]
K02653	pilC; type IV pilus assembly protein PilC
K02669	pilT; twitching motility protein PilT
K02652	pilB; type IV pilus assembly protein PilB
K01889	FARSA; phenylalanyl-tRNA synthetase alpha chain [EC:6.1.1.20]
K00382	DLD; dihydrolipoamide dehydrogenase [EC:1.8.1.4]
K01428	ureC; urease subunit alpha [EC:3.5.1.5]
K07079	uncharacterized protein
K04077	groEL; chaperonin GroEL
K01876	aspS; aspartyl-tRNA synthetase [EC:6.1.1.12]
K18889	mdlA; ATP-binding cassette, subfamily B, multidrug efflux pump
K01601	rbcL; ribulose-bisphosphate carboxylase large chain [EC:4.1.1.39]
K02706	psbD; photosystem II P680 reaction center D2 protein [EC:1.10.3.9]
K02945	RP-S1; small subunit ribosomal protein S1
K01624	FBA; fructose-bisphosphate aldolase, class II [EC:4.1.2.13]
K02434	gatB; aspartyl-tRNA(Asn)/glutamyl-tRNA(Gln) amidotransferase subunit B [EC:6.3.5.6 6.3.5.7]
K02600	nusA; N utilization substance protein A
K01756	purB; adenylosuccinate lyase [EC:4.3.2.2]
K02036	pstB; phosphate transport system ATP-binding protein [EC:3.6.3.27]
K03657	uvrD; DNA helicase II / ATP-dependent DNA helicase PcrA [EC:3.6.4.12]
K00150	gap2; glyceraldehyde-3-phosphate dehydrogenase (NAD(P)) [EC:1.2.1.59]
K02230	cobN; cobaltochelatase CobN [EC:6.6.1.2]
K01869	LARS; leucyl-tRNA synthetase [EC:6.1.1.4]
K01873	VARS; valyl-tRNA synthetase [EC:6.1.1.9]
K02115	ATPF1G; F-type H+-transporting ATPase subunit gamma
K02469	gyrA; DNA gyrase subunit A [EC:5.99.1.3]
K03655	recG; ATP-dependent DNA helicase RecG [EC:3.6.4.12]
K01703	leuC; 3-isopropylmalate/(R)-2-methylmalate dehydratase large subunit [EC:4.2.1.33 4.2.1.35]
K04485	radA; DNA repair protein RadA/Sms
K00036	G6PD; glucose-6-phosphate 1-dehydrogenase [EC:1.1.1.49 1.1.1.363]
K00297	metF; methylenetetrahydrofolate reductase (NADPH) [EC:1.5.1.20]
K00566	mnmA; tRNA-uridine 2-sulfurtransferase [EC:2.8.1.13]
K00053	ilvC; ketol-acid reductoisomerase [EC:1.1.1.86]
K03551	ruvB; holliday junction DNA helicase RuvB [EC:3.6.4.12]
K00003	E1.1.1.3; homoserine dehydrogenase [EC:1.1.1.3]
K01955	carB; carbamoyl-phosphate synthase large subunit [EC:6.3.5.5]
K01585	speA; arginine decarboxylase [EC:4.1.1.19]
K03495	gidA; tRNA uridine 5-carboxymethylaminomethyl modification enzyme
K07456	mutS2; DNA mismatch repair protein MutS2
K01755	argH; argininosuccinate lyase [EC:4.3.2.1]
K04066	priA; primosomal protein N' (replication factor Y) (superfamily II helicase) [EC:3.6.4.-]
K01661	menB; naphthoate synthase [EC:4.1.3.36]
K03569	mreB; rod shape-determining protein MreB and related proteins
K06147	ABCB-BAC; ATP-binding cassette, subfamily B, bacterial
K03650	mnmE; tRNA modification GTPase [EC:3.6.-.-]
K02634	petA; apocytochrome f
K01885	EARS; glutamyl-tRNA synthetase [EC:6.1.1.17]
K00367	narB; ferredoxin-nitrate reductase [EC:1.7.7.2]
K05577	ndhF; NAD(P)H-quinone oxidoreductase subunit 5 [EC:1.6.5.3]
K05575	ndhD; NAD(P)H-quinone oxidoreductase subunit 4 [EC:1.6.5.3]
K13799	panC-cmk; pantoate ligase / CMP/dCMP kinase [EC:6.3.2.1 2.7.4.25]
K03403	chlH; magnesium chelatase subunit H [EC:6.6.1.1]
K00951	relA; GTP pyrophosphokinase [EC:2.7.6.5]
K00278	nadB; L-aspartate oxidase [EC:1.4.3.16]
K05577	ndhF; NAD(P)H-quinone oxidoreductase subunit 5 [EC:1.6.5.3]
K08678	UXS1; UDP-glucuronate decarboxylase [EC:4.1.1.35]
K00012	UGDH; UDPglucose 6-dehydrogenase [EC:1.1.1.22]
K06168	miaB; tRNA-2-methylthio-N6-dimethylallyladenosine synthase [EC:2.8.4.3]
K01874	MARS; methionyl-tRNA synthetase [EC:6.1.1.10]
K05572	ndhA; NAD(P)H-quinone oxidoreductase subunit 1 [EC:1.6.5.3]
K00648	fabH; 3-oxoacyl-[acyl-carrier-protein] synthase III [EC:2.3.1.180]
K07769	nblS; two-component system, OmpR family, sensor histidine kinase NblS [EC:2.7.13.3]
K02316	dnaG; DNA primase [EC:2.7.7.-]
K02836	prfB; peptide chain release factor 2
K00147	proA; glutamate-5-semialdehyde dehydrogenase [EC:1.2.1.41]
K00703	glgA; starch synthase [EC:2.4.1.21]
K01950	E6.3.5.1; NAD+ synthase (glutamine-hydrolysing) [EC:6.3.5.1]
K03696	clpC; ATP-dependent Clp protease ATP-binding subunit ClpC
K17686	copA; Cu+-exporting ATPase [EC:3.6.3.54]
K02433	gatA; aspartyl-tRNA(Asn)/glutamyl-tRNA(Gln) amidotransferase subunit A [EC:6.3.5.6 6.3.5.7]
K03587	ftsI; cell division protein FtsI (penicillin-binding protein 3) [EC:3.4.16.4]
K01990	ABC-2.A; ABC-2 type transport system ATP-binding protein
K02112	ATPF1B; F-type H+-transporting ATPase subunit beta [EC:3.6.3.14]
K01772	hemH; protoporphyrin/coproporphyrin ferrochelatase [EC:4.99.1.1 4.99.1.9]
K01599	hemE; uroporphyrinogen decarboxylase [EC:4.1.1.37]
K04040	chlG; chlorophyll/bacteriochlorophyll a synthase [EC:2.5.1.62 2.5.1.133]
K10960	chlP; geranylgeranyl diphosphate/geranylgeranyl-bacteriochlorophyllide a reductase [EC:1.3.1.83 1.3.1.111]
K01937	pyrG; CTP synthase [EC:6.3.4.2]
K02004	ABC.CD.P; putative ABC transport system permease protein
K02337	dnaE; DNA polymerase III subunit alpha [EC:2.7.7.7]
K00548	metH; 5-methyltetrahydrofolate--homocysteine methyltransferase [EC:2.1.1.13]
	NZ_CP018092.1_prot_WP_099799768.1_111 [locus_tag=BRW62_RS00570] [protein=histidine phosphatase family protein] [protein_id=WP_099799768.1]
	NZ_CP018092.1_prot_WP_099797658.1_150 [locus_tag=BRW62_RS00765] [protein=glycosyltransferase family 1 protein] [protein_id=WP_099797658.1]
	NZ_CP018092.1_prot_WP_099797713.1_207 [locus_tag=BRW62_RS01055] [protein=TIGR03279 family radical SAM protein] [protein_id=WP_099797713.1]
	NZ_CP018092.1_prot_210 [locus_tag=BRW62_RS01070] [protein=oxidoreductase] [pseudo=true] [location=complement(204011..205062)] [gbkey=CDS]
	NZ_CP018092.1_prot_WP_099798253.1_642 [locus_tag=BRW62_RS03245] [protein=glycosyltransferase family 1 protein] [protein_id=WP_099798253.1]
	NZ_CP018092.1_prot_WP_099798888.1_1425 [locus_tag=BRW62_RS07240] [protein=LysR family transcriptional regulator] [protein_id=WP_099798888.1]
	NZ_CP018092.1_prot_WP_099798891.1_1428 [locus_tag=BRW62_RS07255] [protein=AAA family ATPase] [protein_id=WP_099798891.1] [location=complement(1435567..1437066)] [gbkey=CDS]
	NZ_CP018092.1_prot_WP_099798897.1_1438 [locus_tag=BRW62_RS07305] [protein=radical SAM protein] [protein_id=WP_099798897.1] [location=complement(1446071..1447675)] [gbkey=CDS]
	NZ_CP018092.1_prot_WP_099798926.1_1472 [locus_tag=BRW62_RS07475] [protein=DUF1614 domain-containing protein] [protein_id=WP_099798926.1] [location=complement(1485510..1486181)] [gbkey=CDS]
	NZ_CP018092.1_prot_WP_099799050.1_1635 [locus_tag=BRW62_RS08315] [protein=radical SAM protein] [protein_id=WP_099799050.1] [location=1650952..1652526] [gbkey=CDS]
	NZ_CP018092.1_prot_WP_099799051.1_1637 [locus_tag=BRW62_RS08325] [protein=alanine--glyoxylate aminotransferase family protein] [protein_id=WP_099799051.1] [location=1653665..1654819] [gbkey=CDS]
	NZ_CP018092.1_prot_WP_099799896.1_1688 [locus_tag=BRW62_RS08580] [protein=transporter] [protein_id=WP_099799896.1] [location=1713333..1715093] [gbkey=CDS]
	NZ_CP018092.1_prot_WP_099799123.1_1735 [locus_tag=BRW62_RS08815] [protein=DUF1092 family protein] [protein_id=WP_099799123.1] [location=complement(1765632..1766483)] [gbkey=CDS]
	NZ_CP018092.1_prot_WP_099799175.1_1808 [locus_tag=BRW62_RS09185] [protein=molecular chaperone DnaJ] [protein_id=WP_099799175.1] [location=complement(1853367..1854305)] [gbkey=CDS]
	NZ_CP018092.1_prot_WP_099799259.1_1909 [locus_tag=BRW62_RS09690] [protein=CO2 hydration protein] [protein_id=WP_099799259.1]
	NZ_CP018092.1_prot_WP_099799261.1_1911 [locus_tag=BRW62_RS09700] [protein=flavin oxidoreductase] [protein_id=WP_099799261.1] [location=complement(1976782..1978515)] [gbkey=CDS]
	NZ_CP018092.1_prot_WP_099799262.1_1912 [locus_tag=BRW62_RS09705] [protein=MBL fold metallo-hydrolase] [protein_id=WP_099799262.1] [location=complement(1978625..1980340)] [gbkey=CDS]
	NZ_CP018092.1_prot_WP_099799322.1_1992 [locus_tag=BRW62_RS10115] [protein=chlorophyll a/b binding light-harvesting protein] [protein_id=WP_099799322.1] [location=complement(2076533..2077624)] [gbkey=CDS]
	NZ_CP018092.1_prot_WP_099799404.1_2097 [locus_tag=BRW62_RS10655] [protein=YvcK family protein] [protein_id=WP_099799404.1] [location=2186919..2188274] [gbkey=CDS]
